# Supplementary material
Source: publisher figshare collection journal article supplement (https://asha.figshare.com/articles/dataset/_/22029008)
Supplement: Supplementary file 1 [file 1]

**Supplemental Material S3.** Screenshot of a layout of the communicating choices training.

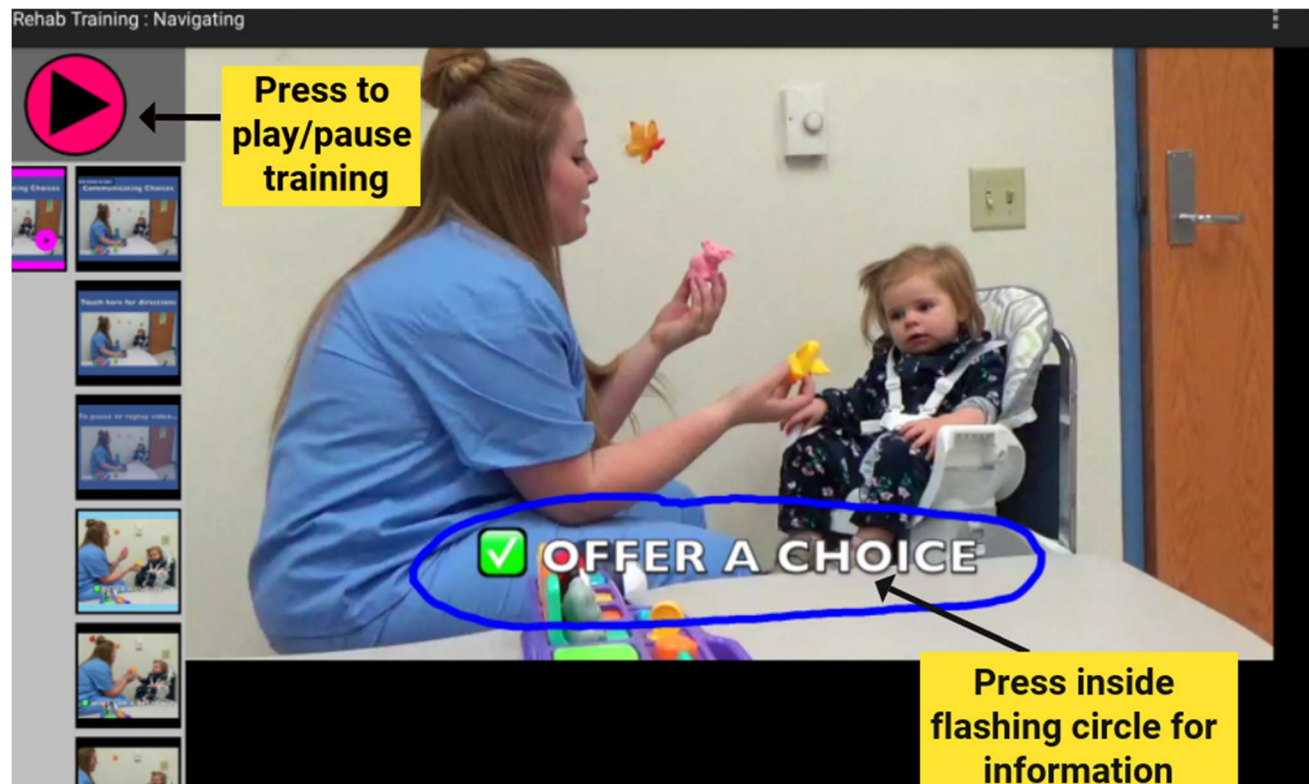

*Note.* Participants would touch the pink circle to play and pause the video training. At selected points in the training, the video would pause and a blue circle (i.e., a hotspot) would flash to alert the participants to touch the content within the circle. When the hotspot was activated, additional audio information related to the training would be played. Once the hotspot activation was complete, the participants would press the pink button to resume the training. Thumbnail photos of the various pause points throughout the training are viewed on left side of the display.
