# Supplementary material
Source: publisher figshare collection journal article supplement (https://asha.figshare.com/articles/dataset/_/22029008)
Supplement: Supplementary file 2 [file 1]

**Supplemental Material S2.** Health care providers' perceptions of the trainings and its effects.

| <b>Social Validity<br/>Questionnaire</b>                                                                         | <b>Strongly<br/>Disagree<br/>(1)</b> | <b>Disagree<br/>(2)</b> | <b>Neither<br/>(3)</b> | <b>Agree<br/>(4)</b> | <b>Strongly<br/>Agree<br/>(5)</b> | <b>Mean</b> |
|------------------------------------------------------------------------------------------------------------------|--------------------------------------|-------------------------|------------------------|----------------------|-----------------------------------|-------------|
| Use of a mobile device (i.e., tablet) was effective to teach the communicating choices procedure.                | 0 (0%)                               | 0 (0%)                  | 0 (0%)                 | 4 (29%)              | 10 (71%)                          | <b>4.71</b> |
| Supporting a patient to communicate choices is part of my job.                                                   | 0 (0%)                               | 0 (0%)                  | 1 (7%)                 | 2 (14%)              | 11 (79%)                          | <b>4.71</b> |
| I would recommend others learn the communicating choices procedure.                                              | 0 (0%)                               | 0 (0%)                  | 1 (7%)                 | 1 (7%)               | 12 (86%)                          | <b>4.79</b> |
| I thought that the mobile training was easy to use.                                                              | 0 (0%)                               | 0 (0%)                  | 0 (0%)                 | 1 (7%)               | 13 (93%)                          | <b>4.93</b> |
| An in-person (i.e., face-to-face) training would be more effective to teach the communicating choices procedure. | 1 (7%)                               | 4 (29%)                 | 9 (64%)                | 0 (0%)               | 0 (0%)                            | <b>2.57</b> |
| The training will help me to interact with children more effectively.                                            | 0 (0%)                               | 0 (0%)                  | 1 (7%)                 | 5 (36%)              | 8 (57%)                           | <b>4.50</b> |
| The video case examples effectively portrayed real clinical scenarios.                                           | 0 (0%)                               | 0 (0%)                  | 1 (7%)                 | 5 (36%)              | 8 (57%)                           | <b>4.50</b> |
| I will use the written checklist in my daily clinical practice.                                                  | 0 (0%)                               | 0 (0%)                  | 1 (7%)                 | 9 (64%)              | 4 (29%)                           | <b>4.21</b> |
| The length of time needed to complete the training was appropriate for my work setting.                          | 0 (0%)                               | 0 (0%)                  | 0 (0%)                 | 3 (21%)              | 11 (79%)                          | <b>4.79</b> |
