# Supplementary material
Source: publisher figshare collection journal article supplement (https://asha.figshare.com/articles/dataset/_/22029008)
Supplement: Supplementary file 3 [file 1]

**Supplemental Material S1.** Training layout and features.

| Section               | Section Description                                                                                                                                                     | Video Examples               | Activity                  | Child Communication Mode and Behavior                                      |
|-----------------------|-------------------------------------------------------------------------------------------------------------------------------------------------------------------------|------------------------------|---------------------------|----------------------------------------------------------------------------|
| Introduction          | Orientation to app and training. Worked video example provided to introduce procedure                                                                                   | Allie & Nurse                | Soothing                  | Reaching with arm, Makes a selection                                       |
| Video case examples   | Multiple video examples (30-60 sec each) demonstrating all procedural steps during natural routine                                                                      | Finn & Respiratory therapist | Vitals                    | Speech and pointing, Makes a selection                                     |
|                       |                                                                                                                                                                         | Josh & General provider      | Rounding                  | Pointing, Makes a selection                                                |
|                       |                                                                                                                                                                         | Josh & General provider      | Snack                     | Pointing and grabbing item, Initially rejects items                        |
|                       |                                                                                                                                                                         | Allie & Nurse                | Night rounding            | Reaching and grabbing item, Initially does not respond                     |
| Practice and feedback | Self-testing opportunities provided during multiple video case examples of procedure demonstrated during natural routines. Video feedback provided during each example. | Addie & Aide                 | Snack                     | Eye pointing, Makes a selection                                            |
|                       |                                                                                                                                                                         | Josh & Therapist             | Play                      | Pointing, Initially rejects items                                          |
|                       |                                                                                                                                                                         | Josh & Physical Therapist    | Dressing                  | Reaching and grabbing item, Makes a selection                              |
|                       |                                                                                                                                                                         | Allie & Therapist            | Dressing                  | Leg and finger pointing, Initially does not respond or response is unclear |
|                       |                                                                                                                                                                         | Addie & Nurse                | Medication administration | Shakes head “no,” Initially rejects items                                  |
| Conclusion            | Closing remarks encouraged providers to use the checklist during their daily tasks                                                                                      | Finn & Nurse                 | Medication administration | Speech and pointing, Makes a selection                                     |
|                       |                                                                                                                                                                         | —                            | —                         | —                                                                          |
